# Supplementary material for: Klüver-Bucy Syndrome Following Traumatic Brain Injury: A Systematic Synthesis and Review of Pharmacological Treatment From Cases in Adolescents and Adults
Source: Atypon-hosted journal article supplement (doi:10.1176/appi.neuropsych.18050112), 2018-10-31
Supplement: appi.neuropsych.18050112.ds001.pdf [file appi.neuropsych.18050112.ds001.pdf]

## Supplementary materials

Number of results for search terms for each database searched

|   |                                                                                                                                    | MEDLINE | PSYCHINFO | EMBASE  | SCOPUS    |
|---|------------------------------------------------------------------------------------------------------------------------------------|---------|-----------|---------|-----------|
| 1 | Injury OR Injuries OR Trauma OR Traumatic OR Posttraumatic OR DAI OR Pneumocephalus OR Contusion OR Brain OR Penetrating OR Closed | 1247655 | 175539    | 1821702 | 2,162,956 |
| 2 | Kluver-Bucy or "Kluver Bucy"                                                                                                       | 267     | 119       | 368     | 338       |
| 3 | 1 and 2 combined                                                                                                                   | 52      | 18        | 93      | 225       |
|   | Total of 388 articles                                                                                                              |         |           |         |           |
